# Supplementary material for: The antimicrobial peptide aurein 1.2 disrupts model membranes via the carpet mechanism
Source: Royal Society of Chemistry journal article supplement (doi:10.1039/c2cp43099a), 2012-01-01
Supplement: c2cp43099a.pdf [file c2cp43099a.pdf]

## The antimicrobial peptide aurein 1.2 disrupts model membranes via the carpet mechanism

David I. Fernandez, Anton P. Le Brun, Thomas C. Whitwell, Marc-Antoine Sani,  
Michael James and Frances Separovic

### SUPPLEMENTAL INFORMATION

**Table S1.** The effect of 10  $\mu\text{M}$  aurein 1.2 on thickness and nSLD of  $d_{54}$ -DMPC bilayers in  $\text{H}_2\text{O}$  and CM4 contrasts.

|                    | Bilayer                    |                                                                   | + 10 $\mu\text{M}$ aurein 1.2 |                                                                   |                                                  |
|--------------------|----------------------------|-------------------------------------------------------------------|-------------------------------|-------------------------------------------------------------------|--------------------------------------------------|
|                    | Thickness ( $\text{\AA}$ ) | nSLD in $\text{H}_2\text{O}$ ( $\times 10^{-6} \text{\AA}^{-2}$ ) | Thickness ( $\text{\AA}$ )    | nSLD in $\text{H}_2\text{O}$ ( $\times 10^{-6} \text{\AA}^{-2}$ ) | nSLD in CM4 ( $\times 10^{-6} \text{\AA}^{-2}$ ) |
| <b>Headgroup 1</b> | $13 \pm 1$                 | $0.81 \pm 0.06$                                                   | $12 \pm 1$                    | $0.13 \pm 0.01$                                                   | $3.21 \pm 0.04$                                  |
| <b>Tails</b>       | $27 \pm 1$                 | $5.88 \pm 0.45$                                                   | $27 \pm 1$                    | $5.39 \pm 0.03$                                                   | $5.43 \pm 0.03$                                  |
| <b>Headgroup 2</b> | $6 \pm 1$                  | $1.88 \pm 0.14$                                                   | $8 \pm 1$                     | $1.49 \pm 0.03$                                                   | $2.30 \pm 0.05$                                  |

**Table S2.** The effect of 10  $\mu\text{M}$  aurein 1.2 on thickness and nSLD of  $d_{54}$ -DMPC/ $d_{54}$ -DMPG (4:1) bilayers in  $\text{H}_2\text{O}$  and CM4 contrasts.

|                    | <b>Bilayer</b>                                 |                                                                                                      | <b>+ 10 <math>\mu\text{M}</math> aurein 1.2</b> |                                                                                                      |                                                                          |
|--------------------|------------------------------------------------|------------------------------------------------------------------------------------------------------|-------------------------------------------------|------------------------------------------------------------------------------------------------------|--------------------------------------------------------------------------|
|                    | <b>Thickness<br/>(<math>\text{\AA}</math>)</b> | <b>nSLD in<br/><math>\text{H}_2\text{O}</math><br/>(<math>\times 10^{-6} \text{\AA}^{-2}</math>)</b> | <b>Thickness<br/>(<math>\text{\AA}</math>)</b>  | <b>nSLD in<br/><math>\text{H}_2\text{O}</math><br/>(<math>\times 10^{-6} \text{\AA}^{-2}</math>)</b> | <b>nSLD in<br/>CM4<br/>(<math>\times 10^{-6} \text{\AA}^{-2}</math>)</b> |
| <b>Headgroup 1</b> | $14 \pm 1$                                     | $0.91 \pm 0.04$                                                                                      | $14 \pm 1$                                      | $0.74 \pm 0.01$                                                                                      | $3.72 \pm 0.05$                                                          |
| <b>Tails</b>       | $26 \pm 1$                                     | $5.66 \pm 0.28$                                                                                      | $23 \pm 1$                                      | $4.64 \pm 0.04$                                                                                      | $5.32 \pm 0.03$                                                          |
| <b>Headgroup 2</b> | $6 \pm 1$                                      | $2.00 \pm 0.08$                                                                                      | $9 \pm 1$                                       | $1.90 \pm 0.04$                                                                                      | $2.79 \pm 0.06$                                                          |

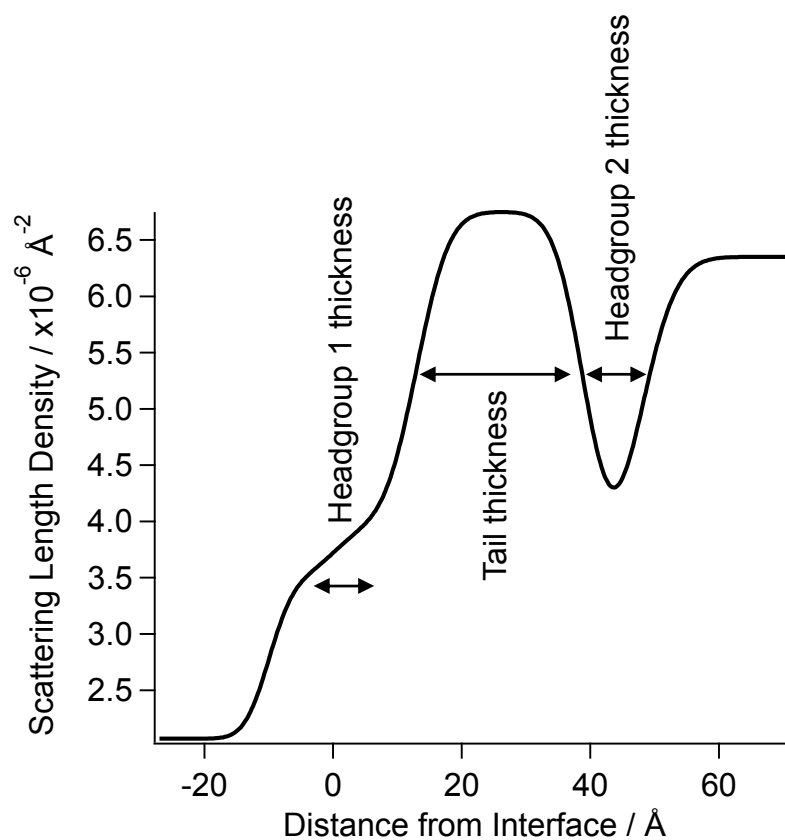

**Supplemental Figure S1.** An nSLD profile of a DMPC bilayer showing how the thickness of each layer is derived.
